# Supplementary material for: Controlled growth of SiC flexible field emitters with clear and sharp tips
Source: Royal Society of Chemistry journal article supplement (doi:10.1039/c3ra46982d), 2014-01-01
Supplement: c3ra46982d.pdf [file c3ra46982d.pdf]

## *Electronic Supplementary Information*

### **Controlled Growth of SiC Flexible Field Emitters with Clear and Sharp Tips**

*Shanliang Chen*<sup>1,2,3</sup>, *Pengzhan Ying*<sup>2</sup>, *Lin Wang*<sup>3</sup>, *Fengmei Gao*<sup>3</sup>, *Guodong Wei*<sup>3</sup>, *Jinju Zheng*<sup>3</sup>, *Zhipeng Xie*<sup>4</sup>, and *Weiyu Yang*<sup>3</sup>

<sup>1</sup> School of Chemical Engineering and Technology, China University of Mining and Technology, Xuzhou City, 221116, P.R. China.

<sup>2</sup> School of Material Science and Engineering, China University of Mining and Technology, Xuzhou City, 221116, P.R. China.

<sup>3</sup> Institute of Materials, Ningbo University of Technology, Ningbo City, 315016, P.R. China.

<sup>4</sup> State Key Laboratory of New Ceramics and Fine Processing, Department of Materials Science and Engineering, Tsinghua University, Beijing, 100084, P.R. China.

#### ***Corresponding Author:***

***E-mail:*** [weiyuyang@tsinghua.org.cn](mailto:weiyuyang@tsinghua.org.cn) (W. Yang)

***Tel:*** +86-574-87080966, ***Fax:*** +86-574-87081221

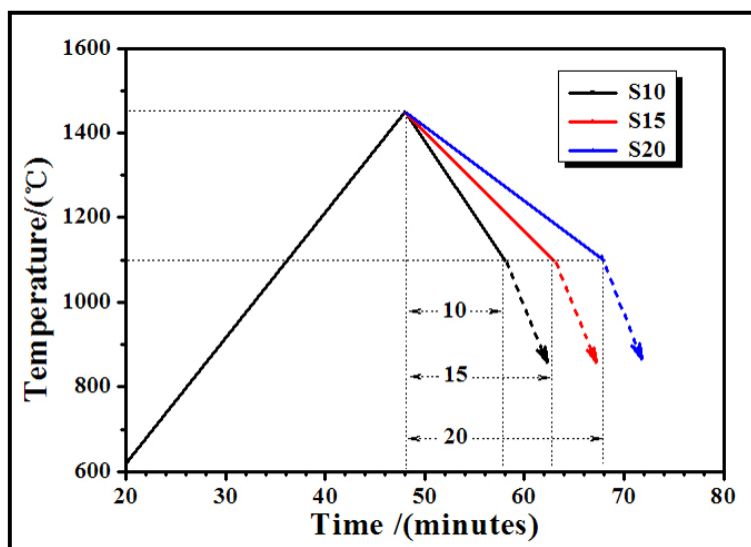

**Fig. S1** Pyrolysis procedures with different cooling times of 10, 15 and 20 min for the growth of quasialigned SiC nanoarrays of S10, S15 and S20.

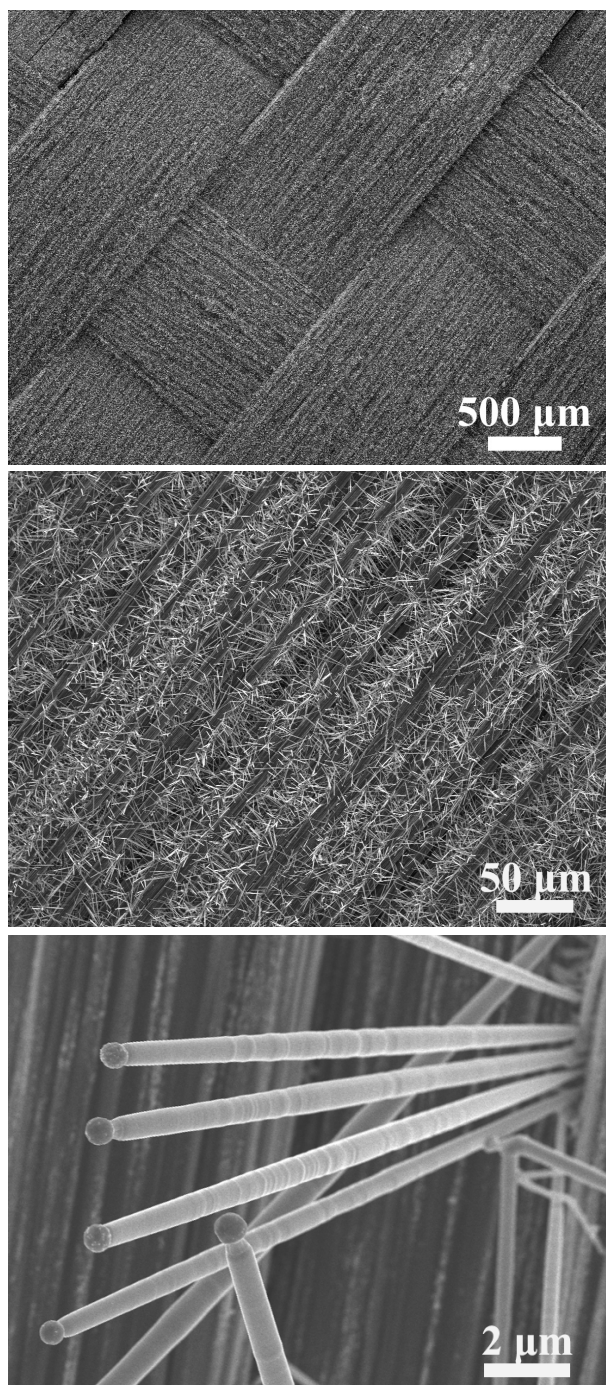

**Fig. S2** Typical SEM images of the quasialigned SiC nanoarrays of S10 with a cooling time of 10 min under different magnifications.

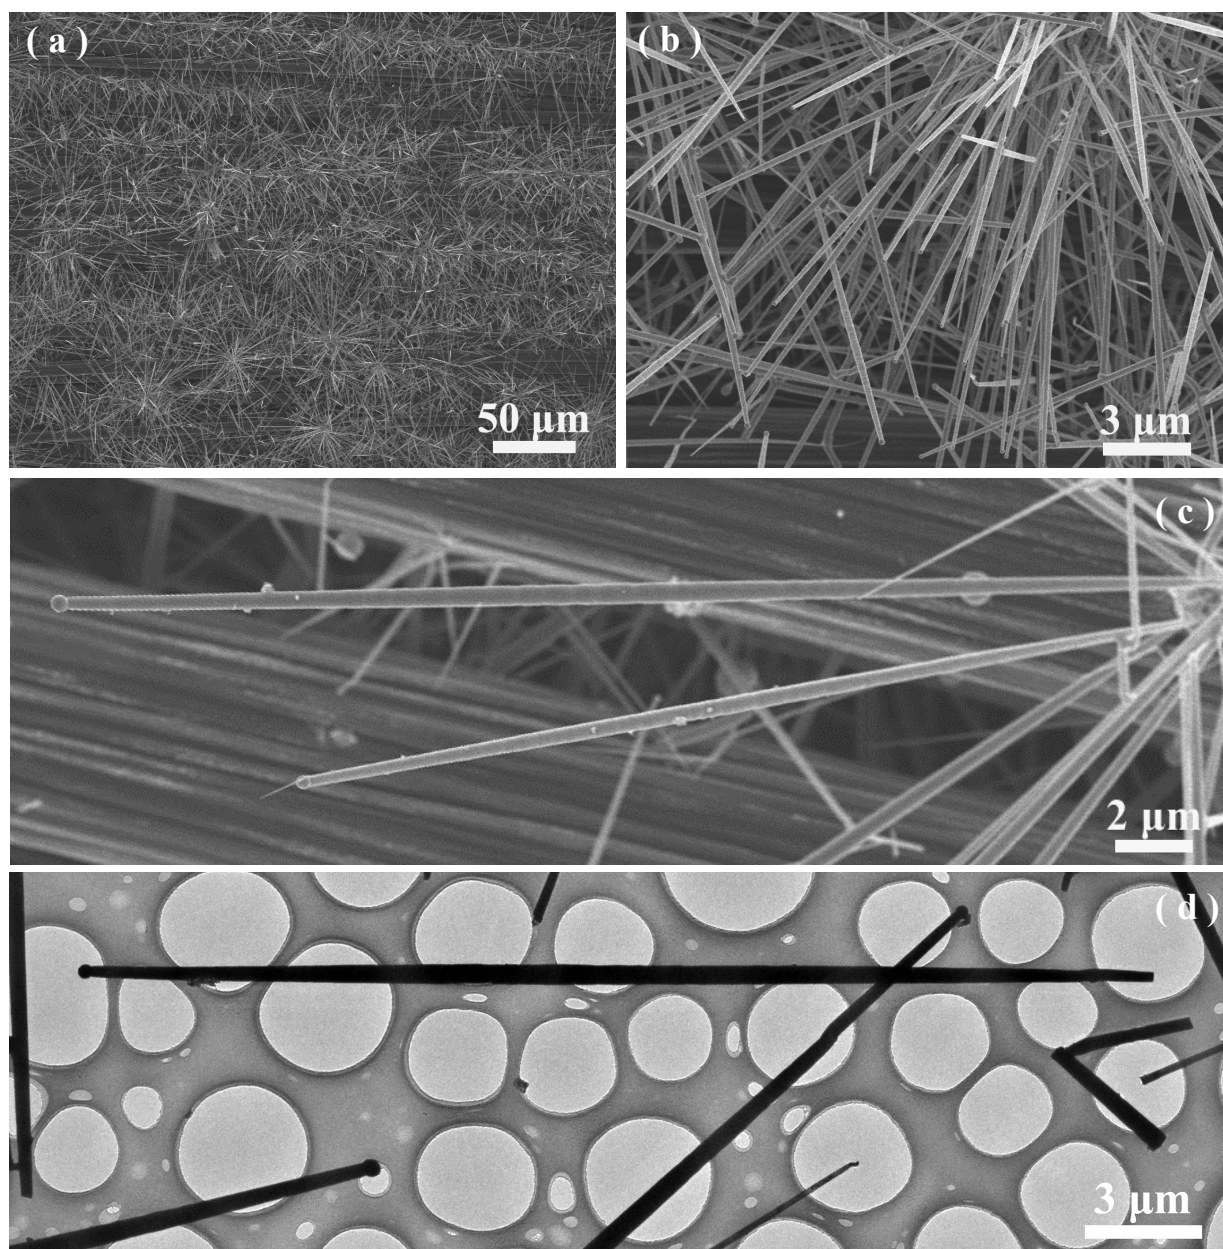

**Fig. S3** Typical SEM (a-c) and TEM (d) images of the quasialigned SiC nanoarrays of S15 with a cooling time of 15 min under different magnifications.

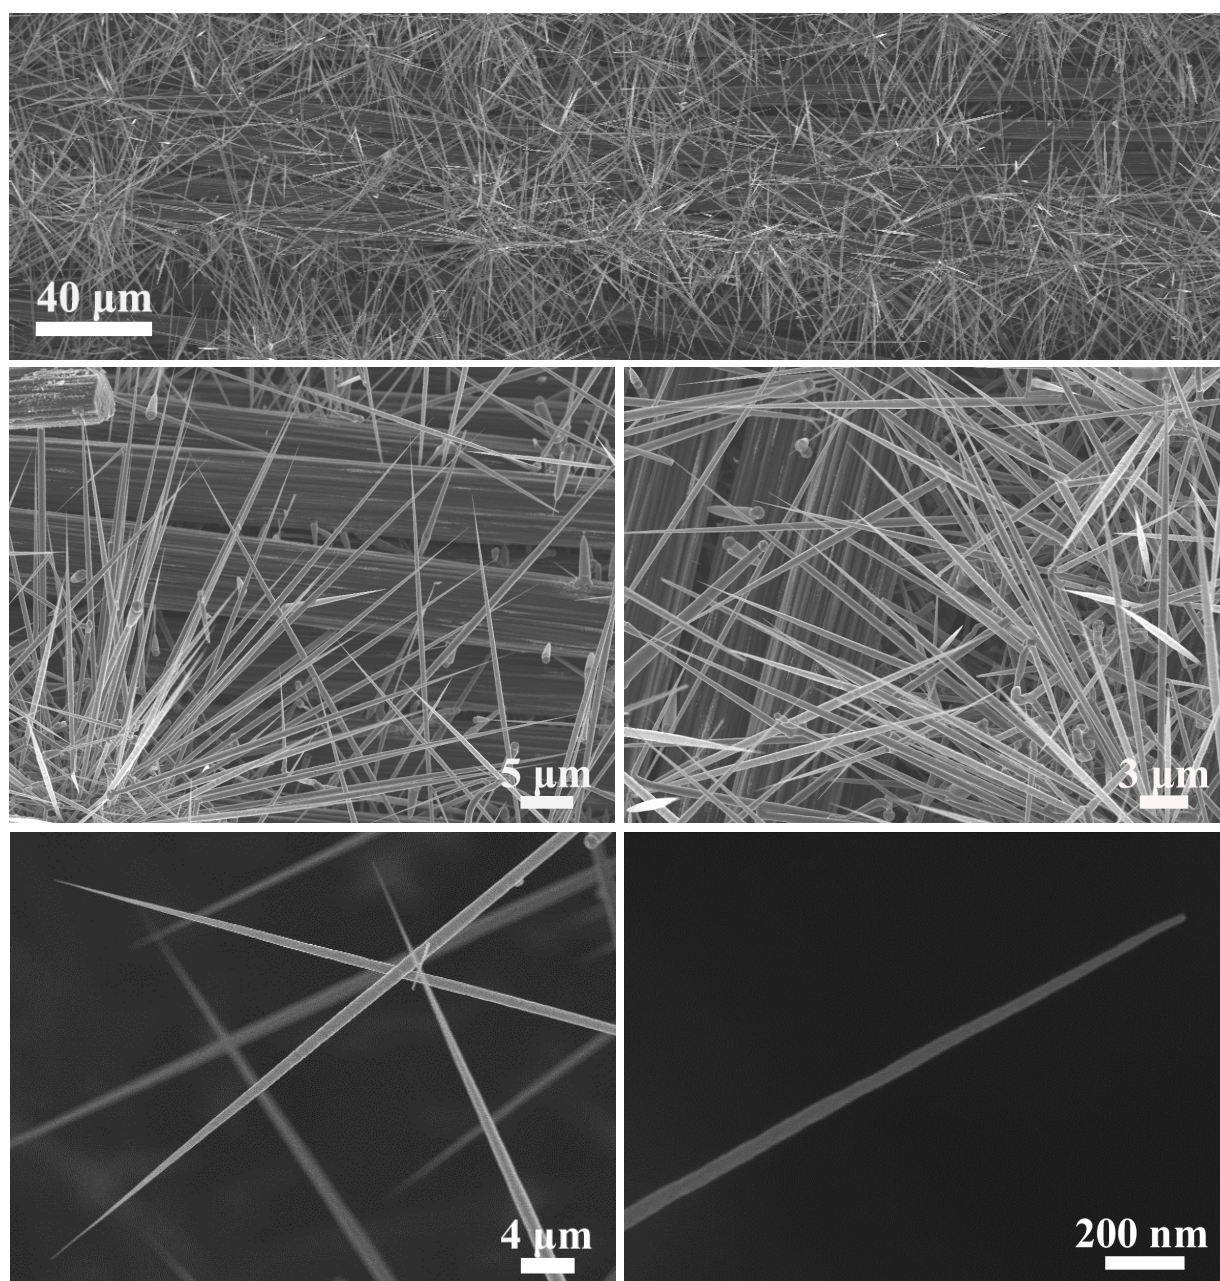

**Fig. S4** Typical SEM images of the quasialigned SiC nanoarrays of S20 with a cooling time of 20 min under different magnifications.

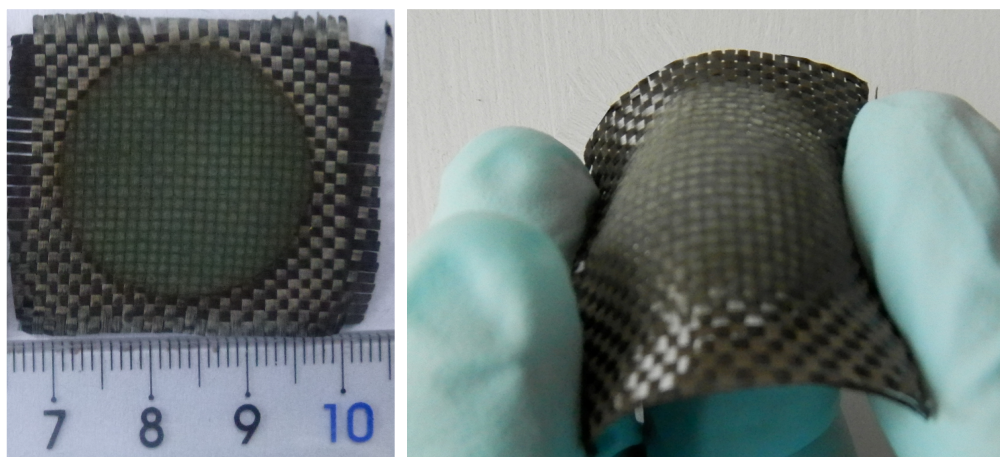

**Fig. S5** Typical digital photos showing the flexibility of the as-synthesized quiasaligned SiC nanoarrays (Data from *J. Mater. Chem. C*, 2013, 1(31): 4779-4784).

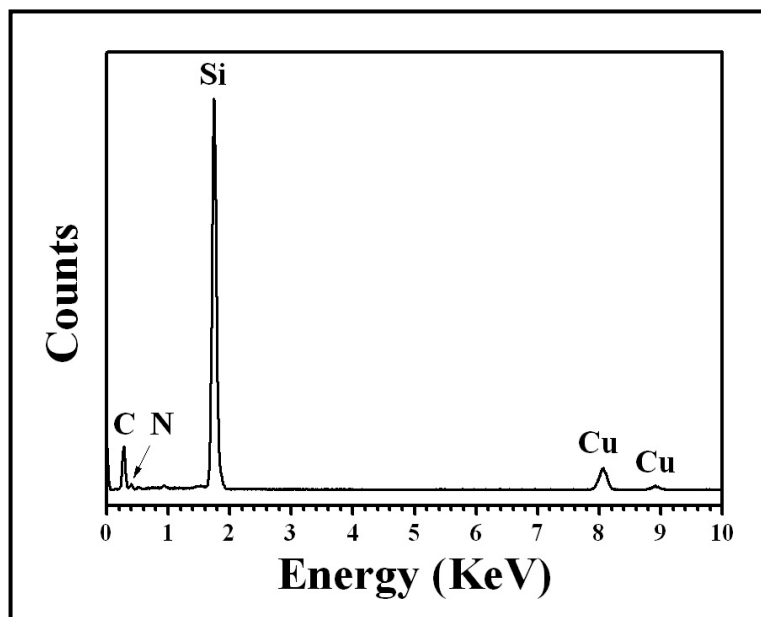

**Fig. S6** A typical EDS pattern recorded from the body of the SiC nanowires of S15.

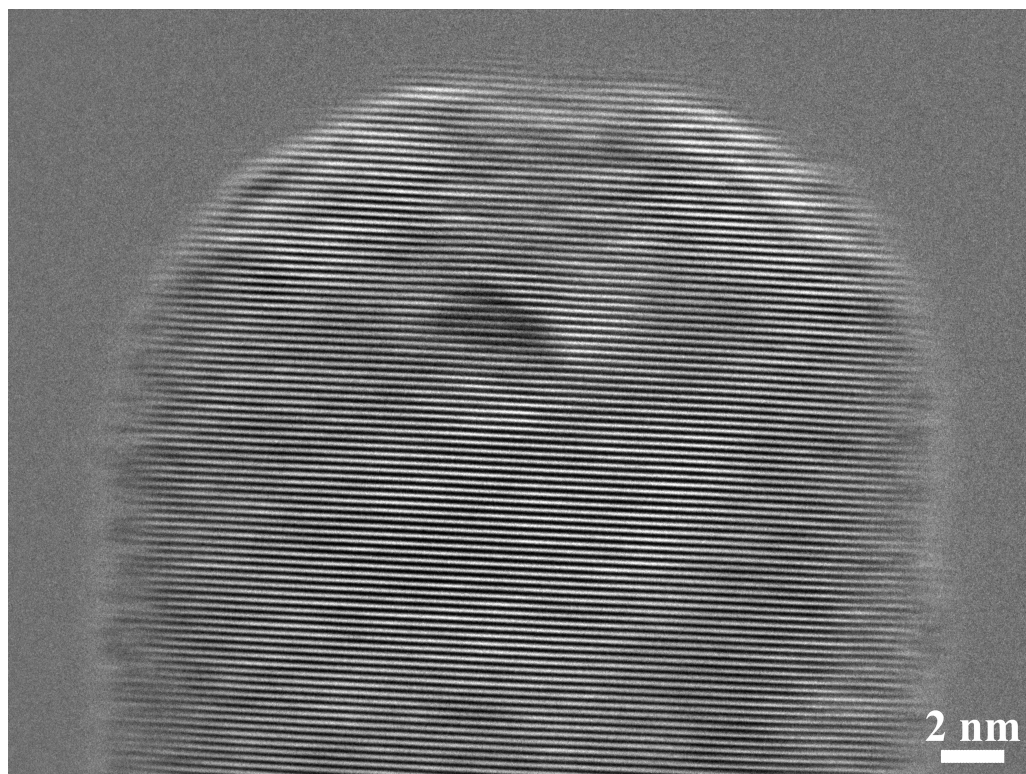

**Fig. S7** A typical HRTEM image of the wire tip of S20, showing the tip are clear and typically sized in  $\sim 5$  nm.



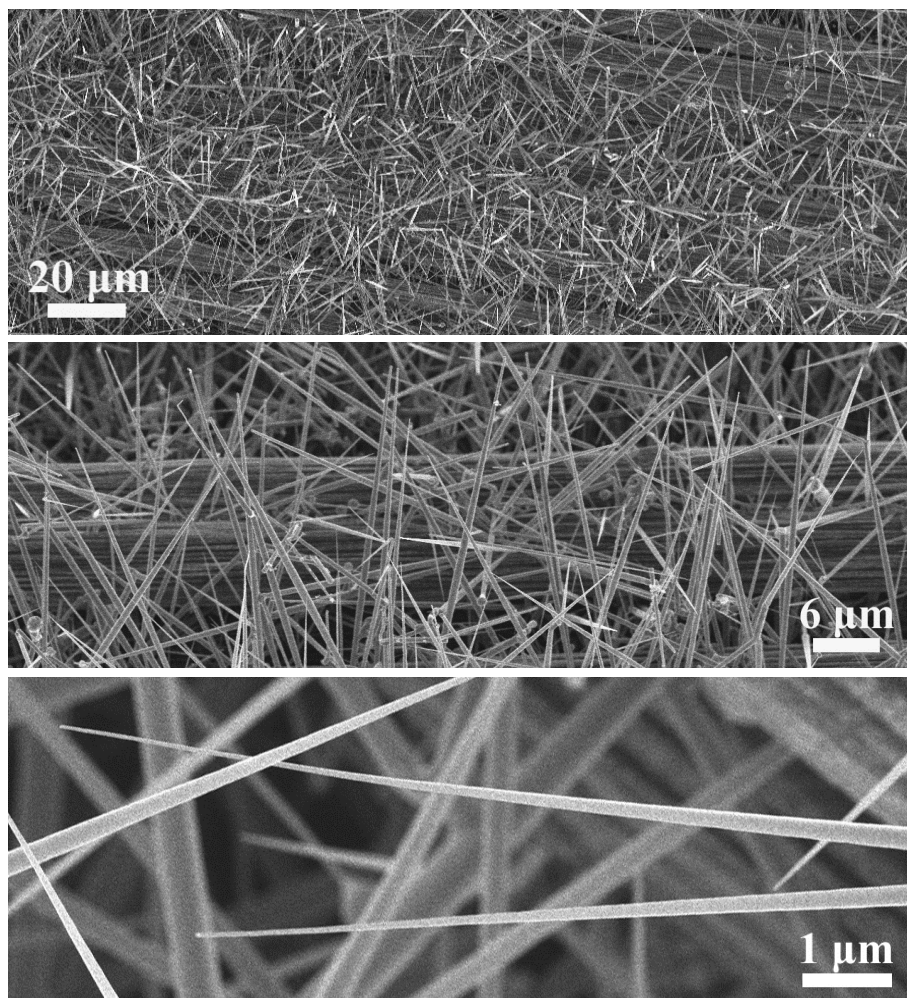

**Fig. S8** Typical SEM images of the quasisaligned SiC nanoarrays of S18 with a cooling time of 18 min under different magnifications.

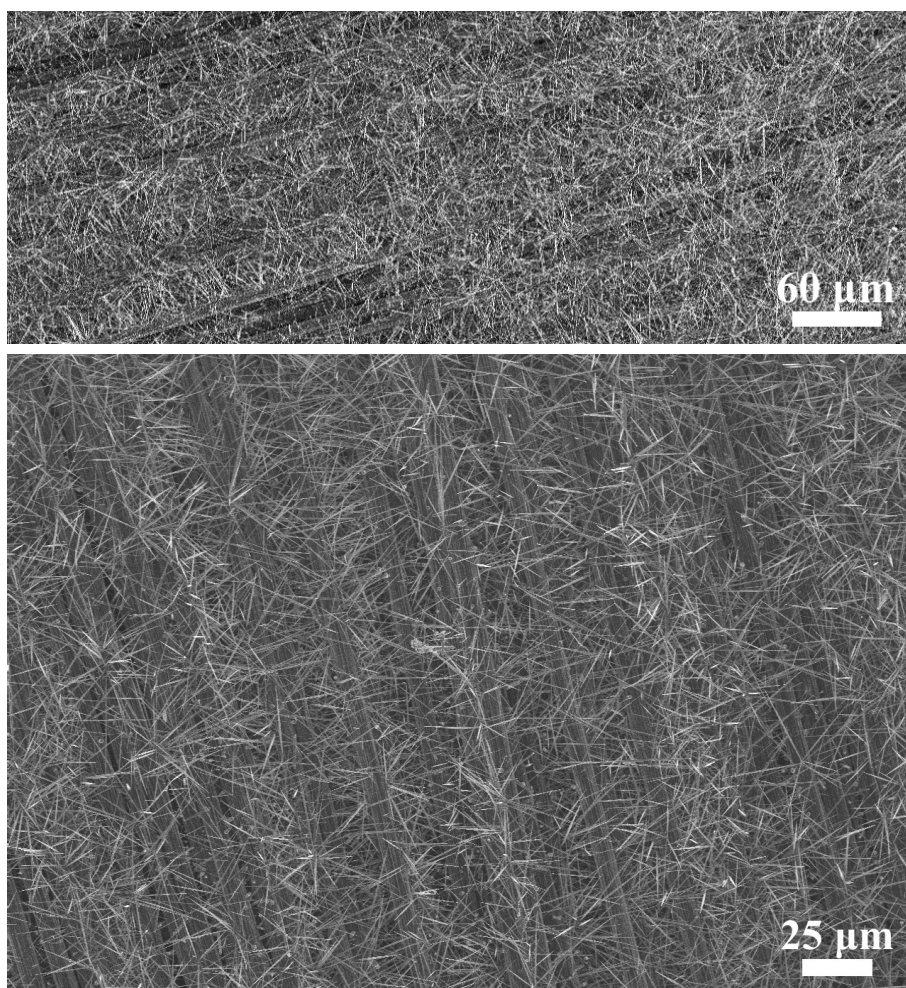

**Fig. S9** Typical SEM images of the quasisaligned SiC nanoarrays of S25 with a cooling time of 25 min under different magnifications.
